# Supplementary material for: Higher-order interactions shape collective dynamics differently in hypergraphs and simplicial complexes
Source: Springer Nature journal article supplement (doi:10.1038/s41467-023-37190-9), 2023-03-23
Supplement: MOESM1 [file 41467_2023_37190_MOESM1_ESM.pdf]

# Supplementary Information

## Higher-order interactions shape collective dynamics differently in hypergraphs and simplicial complexes

Yuanzhao Zhang <sup>\*1</sup>, Maxime Lucas <sup>\*2,3</sup>, and Federico Battiston<sup>4</sup>

<sup>1</sup>*Santa Fe Institute, 1399 Hyde Park Road, Santa Fe, NM 87501, USA*

<sup>2</sup>*ISI Foundation, Via Chisola 5, 10126 Torino, Italy*

<sup>3</sup>*CENTAI Institute, 10138 Torino, Italy*

<sup>4</sup>*Department of Network and Data Science, Central European University, 1100 Vienna, Austria*

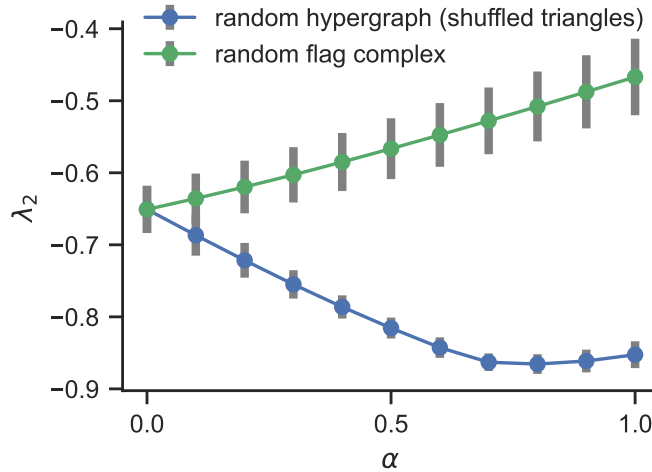

Supplementary Figure S1: **Synchronization is enhanced by higher-order interactions in random hypergraphs but is impeded in simplicial complexes.** Here, we build the simplicial complexes as random flag complexes by generating ER graphs with wiring probability  $p$  and filling all closed triangles with 2-simplices. For each realisation, we build a corresponding random hypergraph by keeping the same 1-hyperedges but move each 2-hyperedge to a random location. This ensures that the random hypergraph has the same number of 1-hyperedges and 2-hyperedges as the original simplicial complex. The maximum transverse Lyapunov exponent  $\lambda_2$  is plotted against  $\alpha$  for random hypergraphs (blue) and simplicial complexes (green). As  $\alpha$  is increased, the coupling goes from first-order-only ( $\alpha = 0$ ) to second-order-only ( $\alpha = 1$ ). Each point represents the average over 5 independent hypergraphs or simplicial complexes with  $n = 100$  nodes. The error bars represent standard deviations. We set  $p = 0.4$  for the simplicial complexes.

<sup>\*</sup>Y.Z. and M.L. contributed equally to this work.

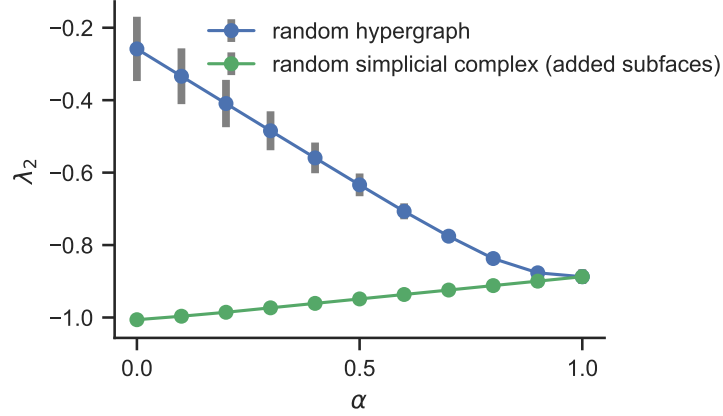

Supplementary Figure S2: **Synchronization is enhanced by higher-order interactions in random hypergraphs but is impeded in simplicial complexes.** Here, we build the random hypergraphs by generating each possible 1-hyperedge and 2-hyperedge with probabilities  $p$  and  $p_{\Delta}$ , respectively. For each realisation, we build a corresponding random simplicial complex by adding 1-hyperedges to satisfy the inclusion condition. The maximum transverse Lyapunov exponent  $\lambda_2$  is plotted against  $\alpha$  for random hypergraphs (blue) and simplicial complexes (green). As  $\alpha$  is increased, the coupling goes from first-order-only ( $\alpha = 0$ ) to second-order-only ( $\alpha = 1$ ). Each point represents the average over 5 independent hypergraphs or simplicial complexes with  $n = 100$  nodes. The error bars represent standard deviations. We set  $p = p_{\Delta} = 0.1$  for the random hypergraphs.

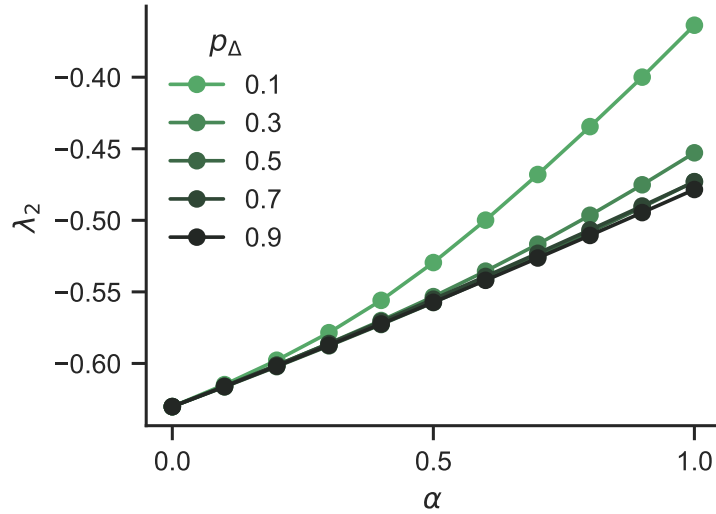

Supplementary Figure S3: **Synchronization is impeded by higher-order interactions in simplicial complexes regardless of the probability of closed triangles being filled.** Here, we build the simplicial complexes as random flag complexes by generating ER graphs with wiring probability  $p$  and filling closed triangles with probability  $p_{\Delta}$ , for a range of  $p_{\Delta}$  values. The maximum transverse Lyapunov exponent  $\lambda_2$  is plotted against  $\alpha$ . As  $\alpha$  is increased, the coupling goes from first-order-only ( $\alpha = 0$ ) to second-order-only ( $\alpha = 1$ ). Each point represents the average over 50 independent simplicial complexes with  $n = 100$  nodes. We set  $p = 0.4$  for the generation of the original ER graphs.

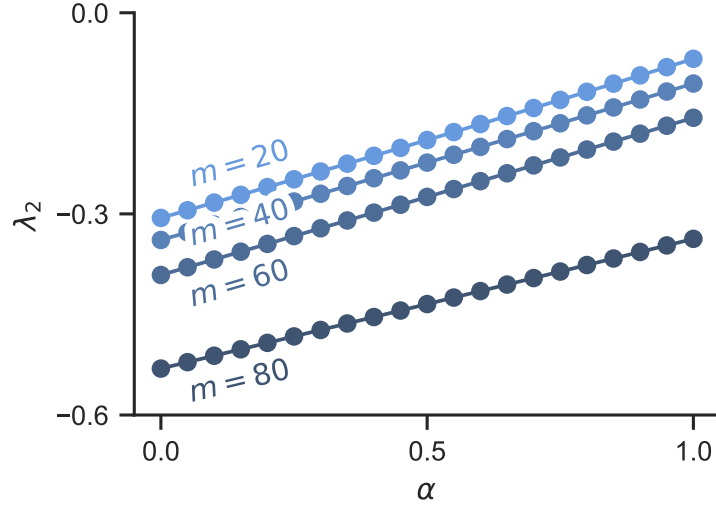

Supplementary Figure S4: **Nonpairwise interactions impede synchronization in simplicial complexes constructed from scale-free networks.** Here, each curve corresponds to a simplicial complex constructed from a scale-free network with  $n = 300$  nodes and mean degree  $2m$ . A scale-free network of  $n$  nodes is grown by starting from an  $m$ -clique and attaching each new node to  $m$  existing nodes. The probability of attachment is proportional to the current degrees of the existing nodes.

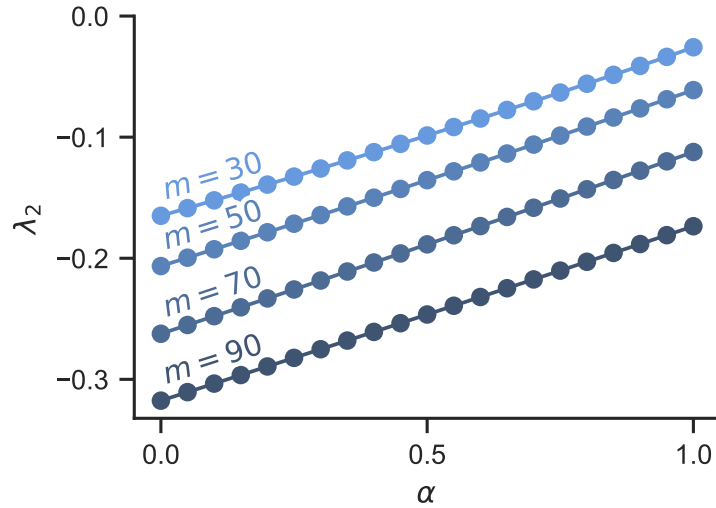

Supplementary Figure S5: **Nonpairwise interactions impede synchronization in simplicial complexes constructed from small-world networks.** Here, each curve corresponds to a simplicial complex constructed from a small-world network with  $n = 300$  nodes and mean degree  $m$ . A small-world network of  $n$  nodes is constructed by starting from a ring network with each node joined with its  $m$  nearest neighbors and randomly rewiring each link with probability  $p_r = 0.15$ .

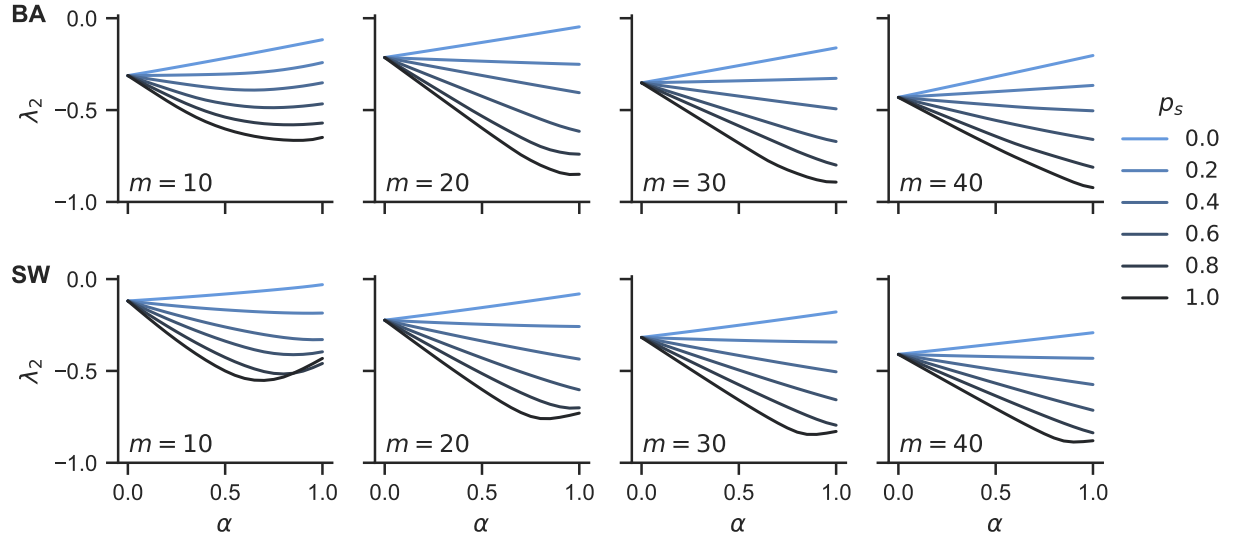

Supplementary Figure S6: **Synchronization stability of hypergraphs constructed from synthetic networks.** Analog of main text Fig. 5, but for scale-free (BA) networks and small-world (SW) networks. The hypergraphs are constructed in the same way as in main text Fig. 5. For each value of  $p_s$ , we plot synchronization stability  $\lambda_2$  (averaged over 100 independent realizations) as a function of the control parameter  $\alpha$ . We fix the network size to  $n = 100$  for both classes of networks. The BA networks have a mean degree of  $2m$ , whereas the SW networks have a mean degree of  $m$ . Regardless of the mean degree, the role of higher-order interactions always transitions from impeding synchronization to promoting synchronization as  $p_s$  is increased.

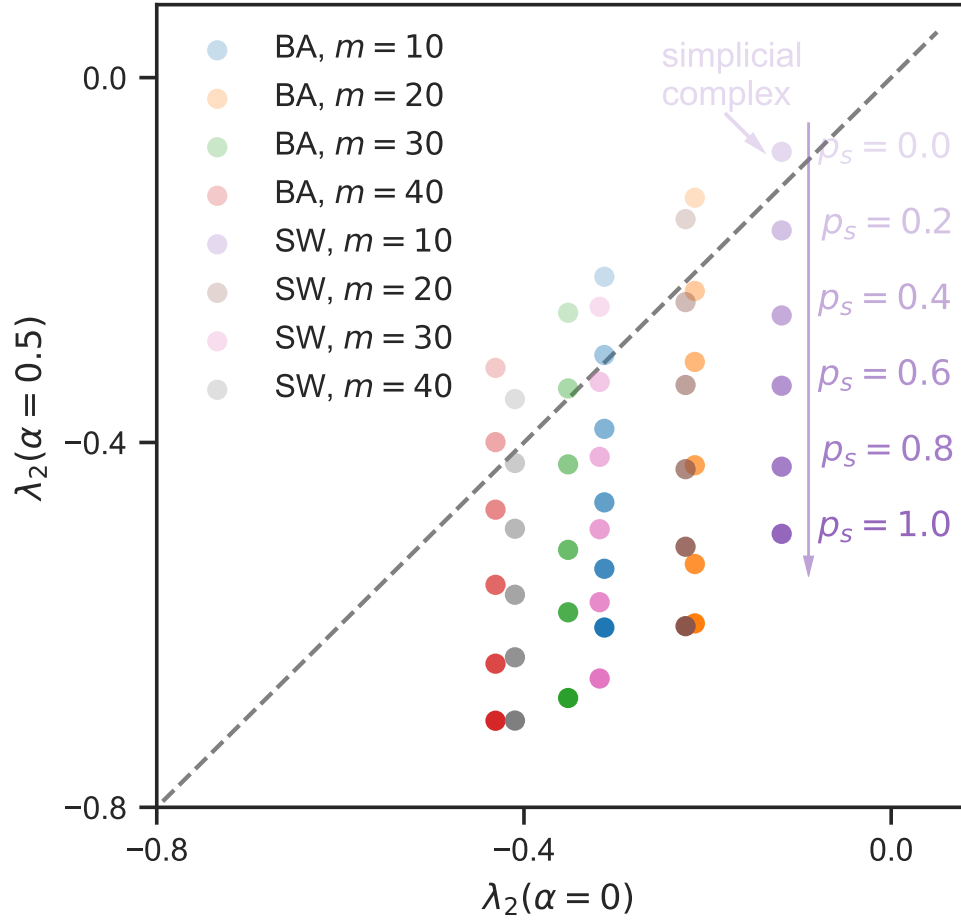

Supplementary Figure S7: **Nonpairwise interactions enhance synchronization in hypergraphs constructed from scale-free (BA) networks and small-world (SW) networks, except when the hypergraph structure is close to being a simplicial complex.** This plot uses the same data as in Supplementary Fig. S6 and is the analogy of main text Fig. 6 for synthetic networks.

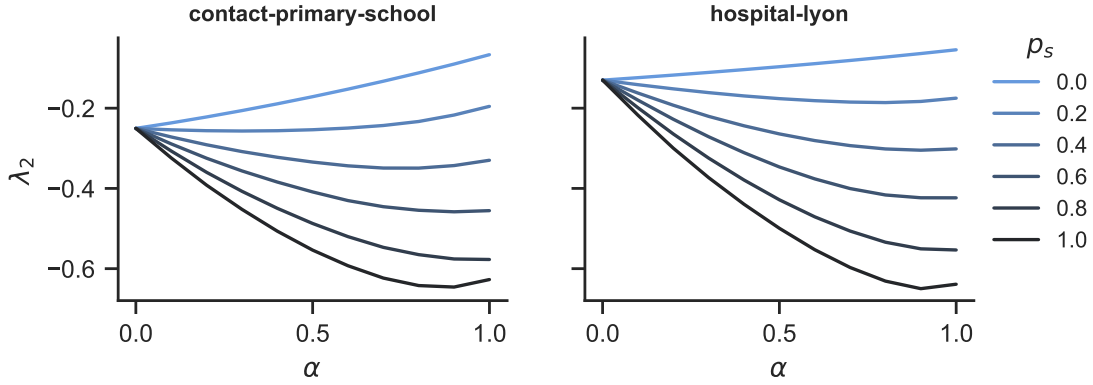

Supplementary Figure S8: **Analog of main text Fig. 5 based on real-world hypergraphs.** The hypergraphs come from social contacts in a Lyon hospital and a primary school. They are known to be close to being simplicial complexes [1]. From these datasets, we keep hyperedges up to order two and consider the largest connected component. For each value of  $p_s$ , we plot synchronization stability  $\lambda_2$  (averaged over 100 independent realizations) as a function of the control parameter  $\alpha$ . The role of higher-order interactions quickly transitions from impeding synchronization to promoting synchronization as  $p_s$  is increased.

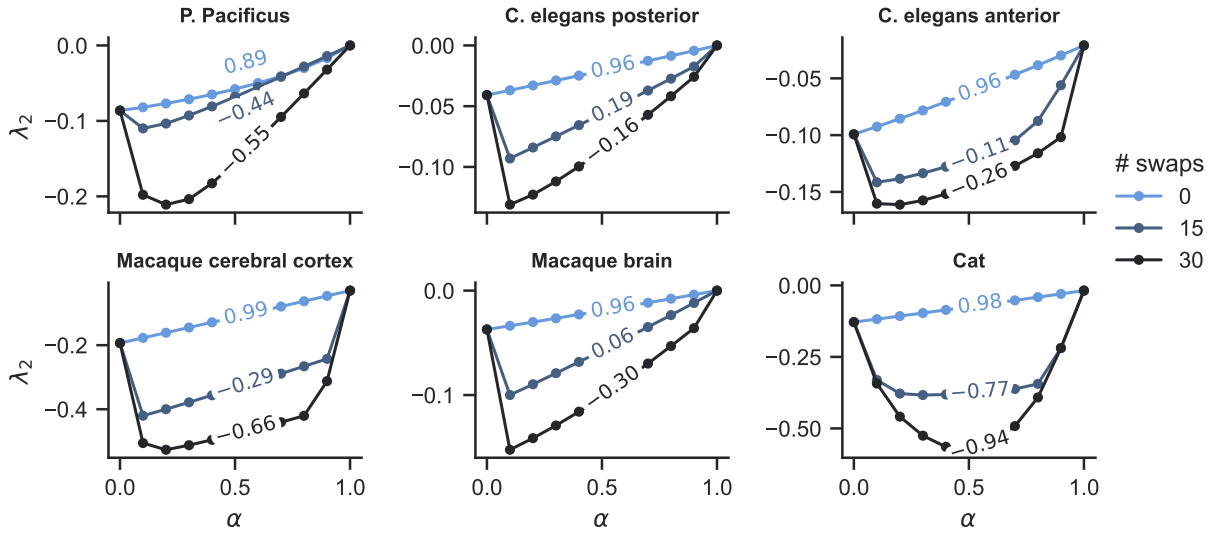

Supplementary Figure S9: **Cross-order degree correlation affects synchronization stability in systems with mixed pairwise and nonpairwise interactions ( $0 < \alpha < 1$ ).** This plot uses the same networks as in main text Fig. 5 and extends main text Fig. 7. Curves are colour-coded by the number of pairs of nodes that were selected to swap their 2-simplices memberships: 0, 15, or 30. The resulting degree correlation is indicated on each curve.

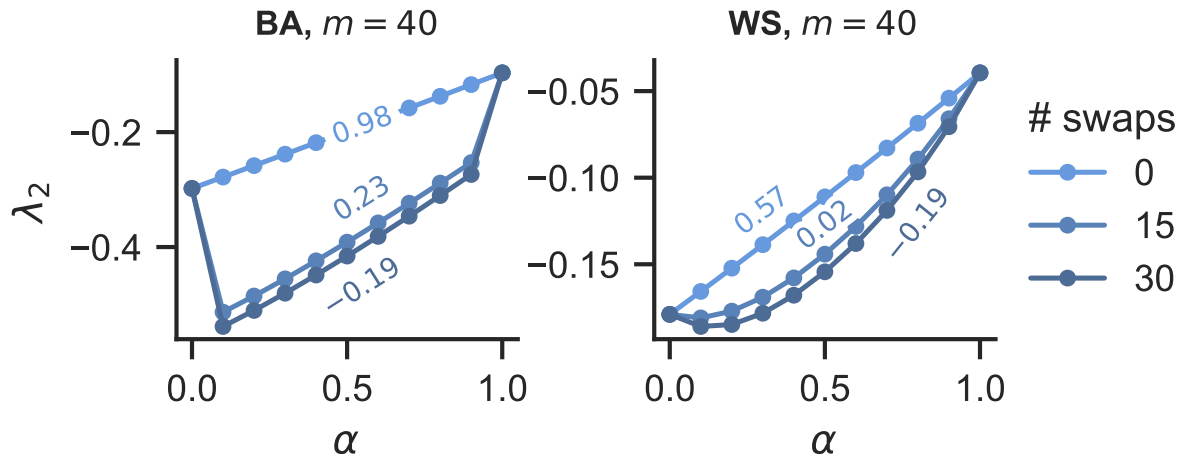

Supplementary Figure S10: **Cross-order degree correlation affects synchronization stability in systems with mixed pairwise and nonpairwise interactions** ( $0 < \alpha < 1$ ). The hypergraphs are constructed from scale-free and small-world networks, with the same parameters as in Supplementary Figs. S4 and S5:  $n = 300$ ,  $m = 40$ , and  $p_r = 0.15$ . Curves are colour-coded by the number of pairs of nodes that were selected to swap their 2-simplices memberships: 0, 15, or 30. The resulting cross-order degree correlation is indicated on each curve.

## References

- [1] Lotito, Q. F., Musciotto, F., Montresor, A. & Battiston, F. Higher-order motif analysis in hypergraphs. *Commun. Phys.* **5**, 79 (2022).
